# Supplementary material
Source: publisher figshare collection journal article supplement (https://frontiersin.figshare.com/ndownloader/files/13514375)
Supplement: Supplementary file 1 [file 13514375]

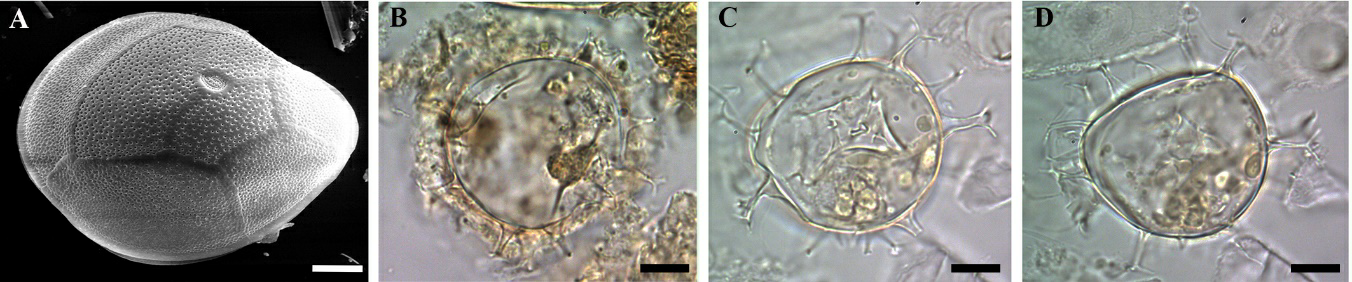


Figure S2. (A) *Gambierdiscus* sp. found in King Fish, Caribbean coast of Guatemala; and some dinoflagellate cysts found in Punta Caracol, Caribbean coast of Mexico: *Spiniferites* spp. (B), *Spiniferites hyperacanthus* (C and D). Scale: 10 µm.
